# Supplementary material for: Organic compound-based nanozymes for agricultural herbicide detection
Source: Royal Society of Chemistry journal article supplement (doi:10.1039/d3nr02025h), 2023-01-01
Supplement: d3nr02025h1.pdf [file d3nr02025h1.pdf]

Electronic Supplementary Material (ESI) for Nanoscale.  
This journal is © The Royal Society of Chemistry 2023

## **Electronic Supplementary Information**

### **Organic compound-based nanozyme for agricultural herbicide detection**

*Dong Hoon Lee and Mohammed Kamruzzaman*

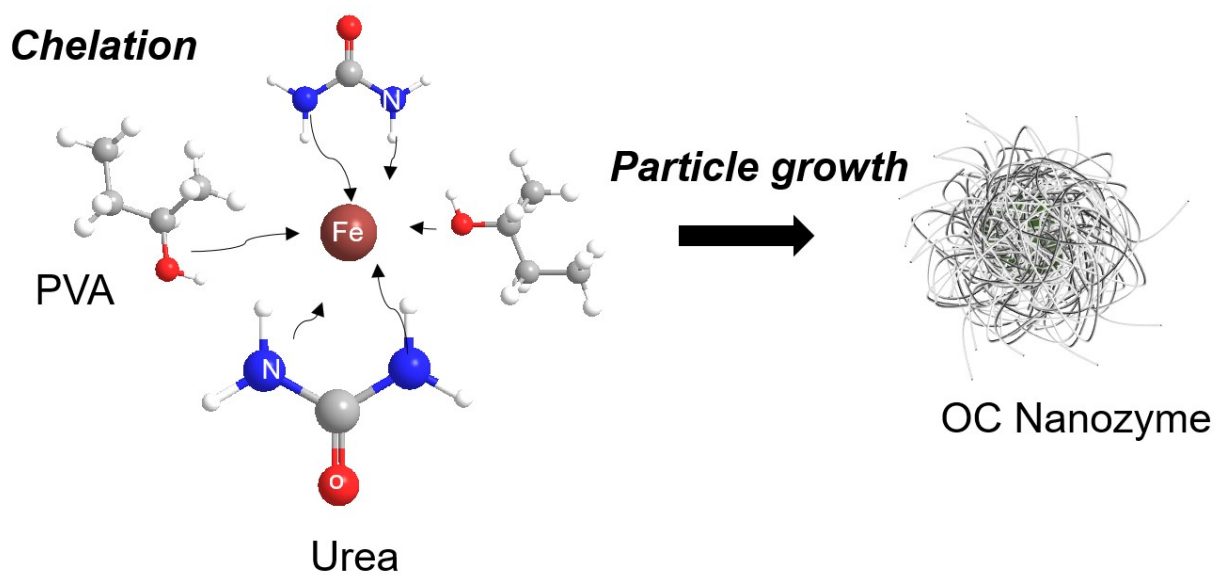

**Figure S1.** Illustrated Conceptualization of the OC nanozyme

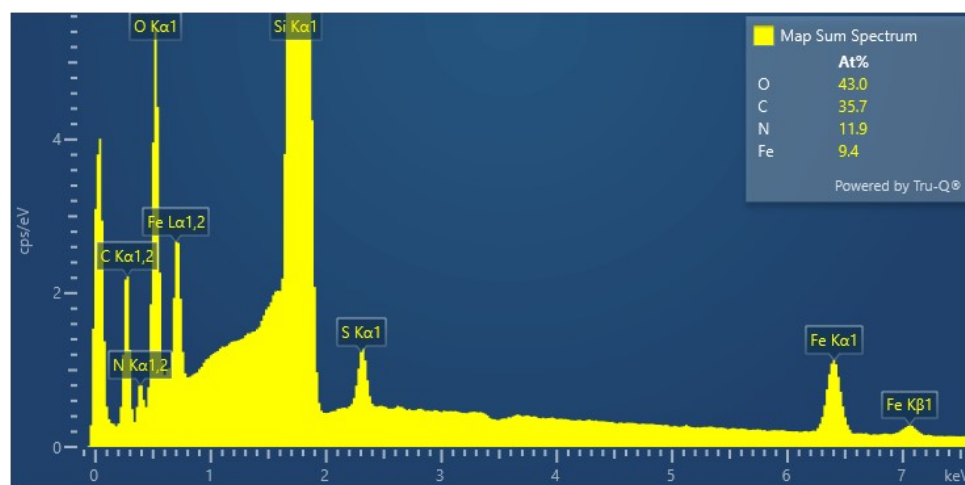

**Figure S2.** Quantified profile of the SEM/EDS analysis on OC nanozyme

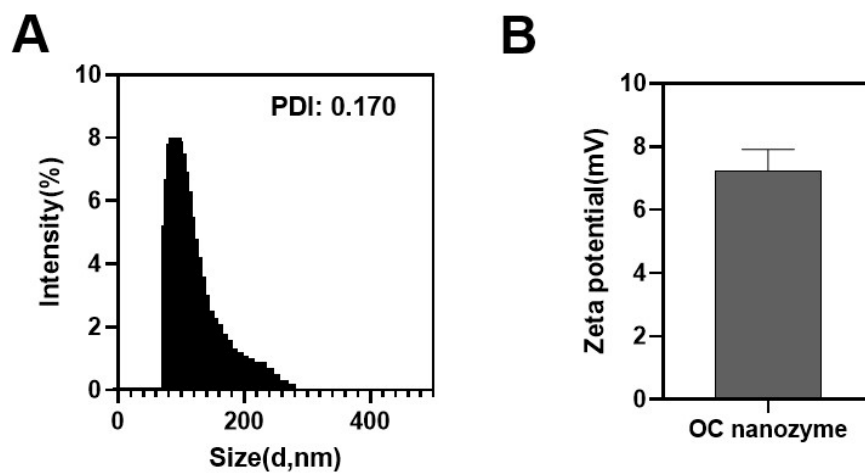

**Figure S3.** DLS, Zeta potential of OC nanozyme (*Zeta potential*,  $N=3$ ,  $IN = 33$  counts)

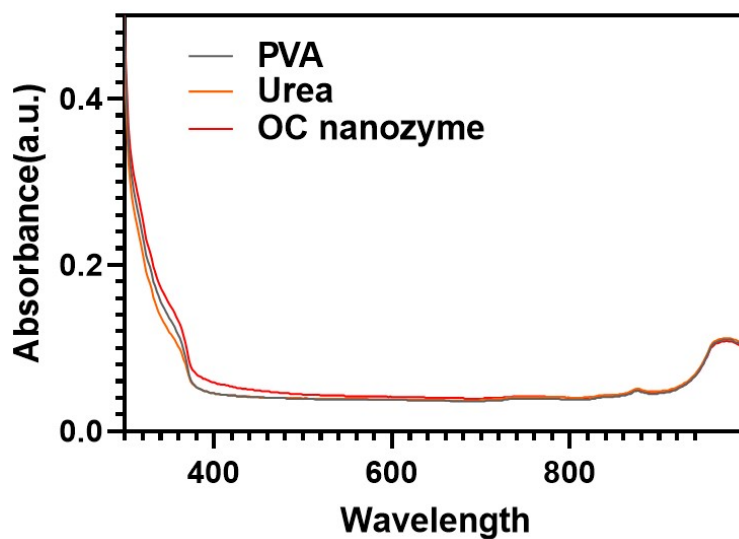

**Figure S4.** UV-VIS-NIR absorption spectra of the OC nanozyme, Urea and PVA

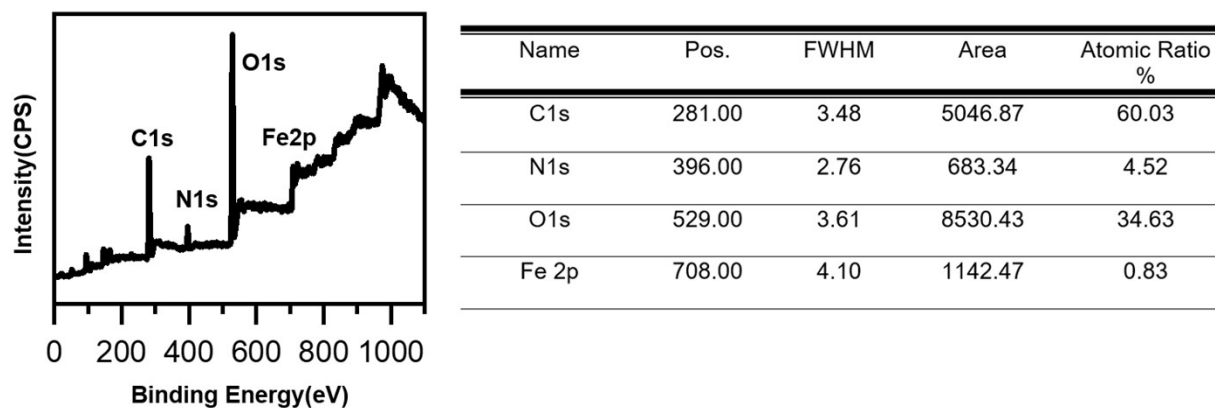

**Figure S5.** XPS survey and its quantification table

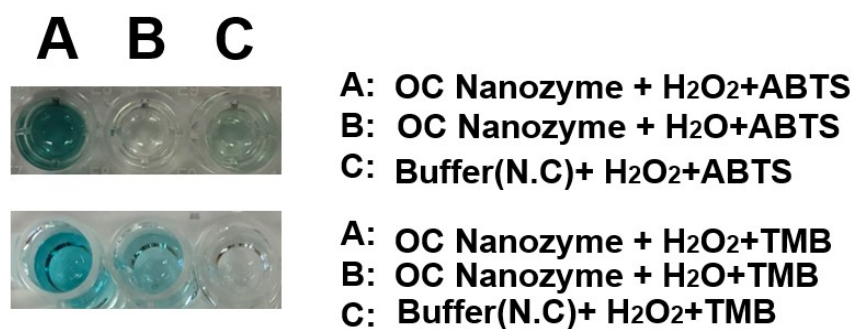

**Figure S6.** Result image of the OC nanozyme-ABTS(TMB)-substrate colorimetric assay

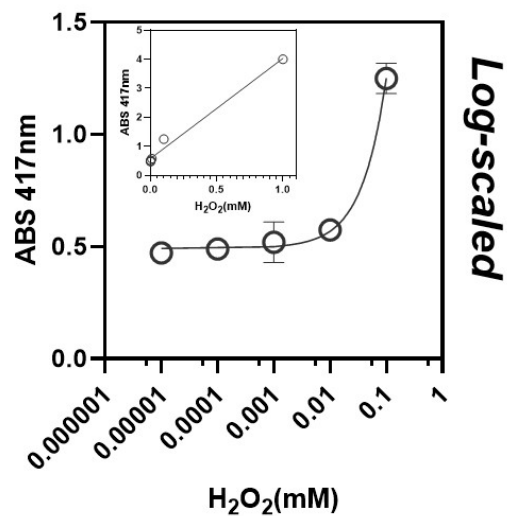

**Figure S7.** Logscale Substrate(H<sub>2</sub>O<sub>2</sub>) dependent Linearity (inbox: normal)  $R^2 = 0.9856$  ( $N=3$ )

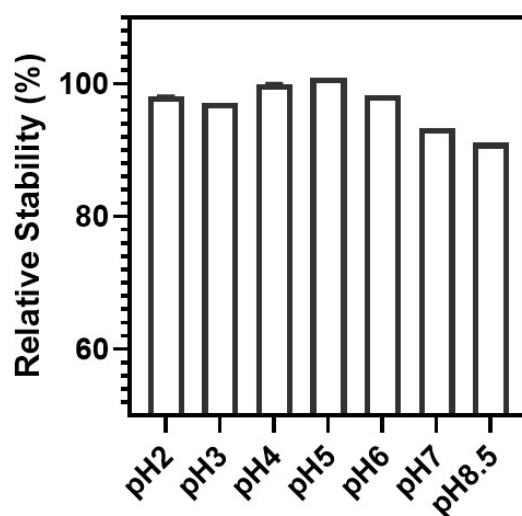

**Figure S8.** Relative pH stability after incubation of the NaAc buffer up to 5 hours (pH 4 = 100%) ( $N=5$ )

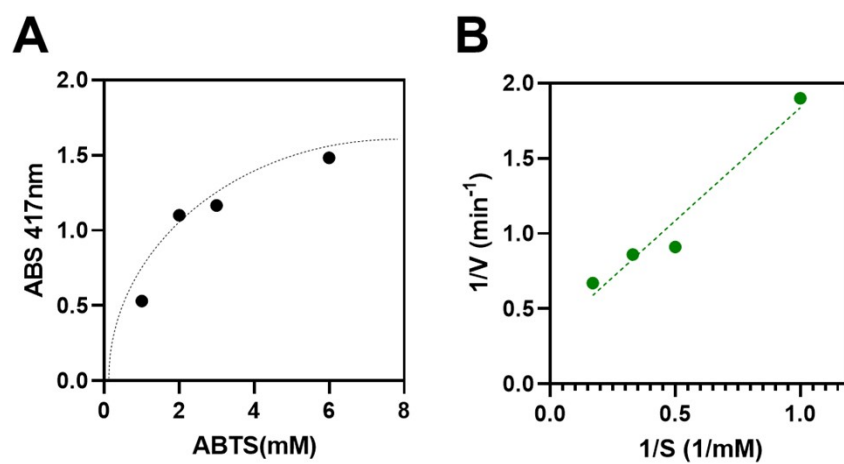

**Figure S9.** Steady-State kinetic assay for the ABTS( $N=3$ )

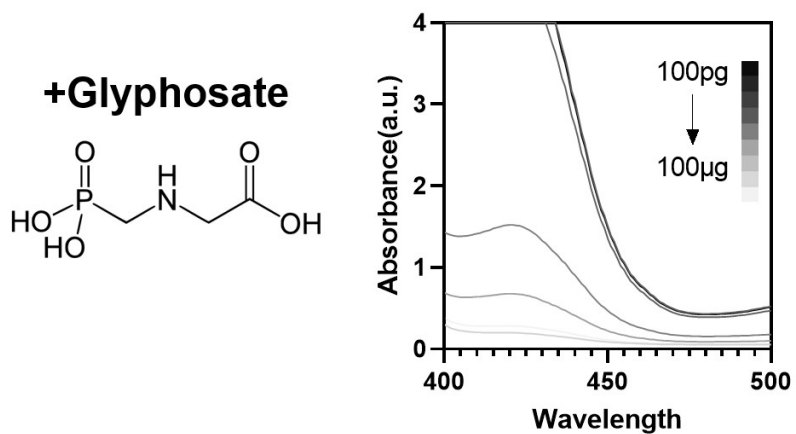

**Figure S10.** Absorbance spectra depend on the concentration of the glyphosate on OC nanozyme/ $H_2O_2$ /ABTS assay.

**Table S1.** Kinetic profiles with the references.

| Nanozyme                       | Km(mM) | Vmax ( $\mu\text{M s}^{-1}$ ) | Kcat ( $10^{-1} \text{ s}^{-1}$ ) | Kcat/Km ( $\text{mM}^{-1} \text{ s}^{-1}$ ) | Substrate                     | Reference |
|--------------------------------|--------|-------------------------------|-----------------------------------|---------------------------------------------|-------------------------------|-----------|
| OC nanozyme                    | 0.056  | 2.195                         | $1.6 \times 10^5$                 | -                                           | H <sub>2</sub> O <sub>2</sub> | This work |
| Nano-CeO <sub>2</sub>          | 0.420  | 0.100                         | 0.02                              | 0.005                                       | H <sub>2</sub> O <sub>2</sub> | Ref.SI.1  |
| FeN5 SA/CNF                    | 0.148  | 0.758                         | 7.08                              | 4.786                                       | H <sub>2</sub> O <sub>2</sub> | Ref.SI.2  |
| HRP (natural enzyme)           | 3.70   | 0.871                         | $3.48 \times 10^3$                | 0.94                                        | H <sub>2</sub> O <sub>2</sub> | Ref.SI.3  |
| Zn-N-C 800                     | 0.14   | 3.31                          | -                                 | 0.014                                       | H <sub>2</sub> O <sub>2</sub> | Ref.SI.4  |
| PMCS                           | 40.32  | 12.15                         | -                                 | -                                           | H <sub>2</sub> O <sub>2</sub> | Ref.SI.5  |
| CU SAzyme                      | 9.89   | 3.85                          | -                                 | -                                           | H <sub>2</sub> O <sub>2</sub> | Ref.SI.6  |
| MCCP                           | 2.02   | 0.004                         | 3.49                              | -                                           | H <sub>2</sub> O <sub>2</sub> | Ref.SI.7  |
| Fe <sub>3</sub> O <sub>4</sub> | 154    | 0.097                         | $8.54 \times 10^4$                | -                                           | H <sub>2</sub> O <sub>2</sub> | Ref.SI.3  |

## Reference

- 1 H. Cheng, S. Lin, F. Muhammad, Y.-W. Lin and H. Wei, *ACS Sens*, 2016, **1**, 1336–1343.
- 2 L. Huang, J. Chen, L. Gan, J. Wang and S. Dong, *Sci Adv*, 2019, **5**, eaav5490.
- 3 L. Gao, J. Zhuang, L. Nie, J. Zhang, Y. Zhang, N. Gu, T. Wang, J. Feng, D. Yang and S. Perrett, *Nat Nanotechnol*, 2007, **2**, 577–583.
- 4 Q. Wang, T. Ina, W.-T. Chen, L. Shang, F. Sun, S. Wei, D. Sun-Waterhouse, S. G. Telfer, T. Zhang and G. I. N. Waterhouse, *Sci Bull (Beijing)*, 2020, **65**, 1743–1751.
- 5 B. Xu, H. Wang, W. Wang, L. Gao, S. Li, X. Pan, H. Wang, H. Yang, X. Meng and Q. Wu, *Angewandte Chemie*, 2019, **131**, 4965–4970.
- 6 M. Chang, Z. Hou, M. Wang, D. Wen, C. Li, Y. Liu, Y. Zhao and J. Lin, *Angewandte Chemie International Edition*, 2022, **61**, e202209245.
- 7 J. Zhou, D. Xu, G. Tian, Q. He, X. Zhang, J. Liao, L. Mei, L. Chen, L. Gao and L. Zhao, *J Am Chem Soc*, 2023, **145**, 4279–4293.

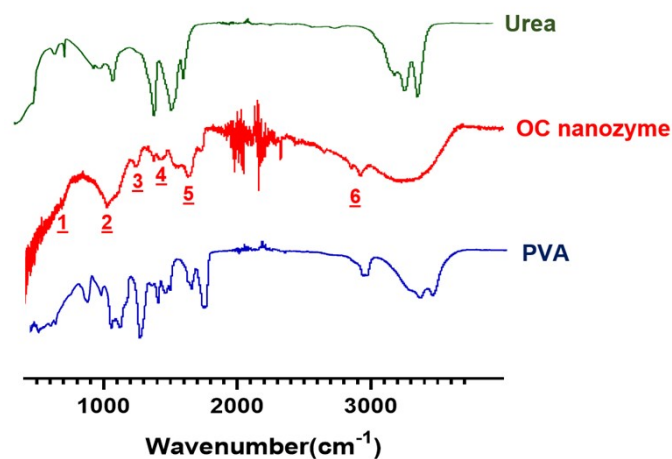

**Figure S11.** FT-IR spectra analysis of Urea, PVA and OC nanozyme(adjusted)

: Number) Wavenumber (Bond) <sup>reference</sup>

- 1)  $569\text{cm}^{-1}$ (Fe-O) <sup>Ref.SI.8</sup> 2)  $1063\text{cm}^{-1}$  (Fe-N) <sup>Ref.SI.9</sup> 3)  $1370\text{cm}^{-1}$  (C-H) <sup>Ref.SI.10</sup> 4)  $1450\text{cm}^{-1}$ (C-N) <sup>Ref.SI.11</sup> 5)  $1645\text{cm}^{-1}$  (C=O) <sup>Ref.SI.12</sup> 6)  $2862\text{cm}^{-1}$  /  $2942\text{cm}^{-1}$ (-CH<sub>2</sub>-) <sup>Ref.SI.13</sup>

## Reference

8. J. Mohapatra, A. Mitra, H. Tyagi, D. Bahadur and M. Aslam, *Nanoscale*, 2015, **7**, 9174–9184.
9. G. Anandhababu, S. C. Abbas, J. Lv, K. Ding, Q. Liu, D. D. Babu, Y. Huang, J. Xie, M. Wu and Y. Wang, *Dalton Transactions*, 2017, **46**, 1803–1810.
10. E. Katoueizadeh, S. M. Zebarjad and K. Janghorban, *Journal of Materials Research and Technology*, 2019, **8**, 541–552.
11. Y. Wang, K. Jiang, J. Du, L. Zheng, Y. Li, Z. Li and H. Lin, *Nanomicro Lett*, , DOI:10.1007/s40820-021-00718-z.
12. Y. T. Wang, H. B. Zhao, K. Degracia, L. X. Han, H. Sun, M. Sun, Y. Z. Wang and D. A. Schiraldi, *ACS Appl Mater Interfaces*, 2017, **9**, 42258–42265.
13. Y. Jiang, W. Zhou, M. Jiang, P. Liu and J. Xu, *Polym Degrad Stab*, 2017, **144**, 331–343.
